# Supplementary material for: Performance determinants of unsupervised clustering methods for microbiome data
Source: PubMed Central journal article supplement (PMC8817542; doi:10.1186/s40168-021-01199-3), 2022-02-05

0 Levels Trimmed off

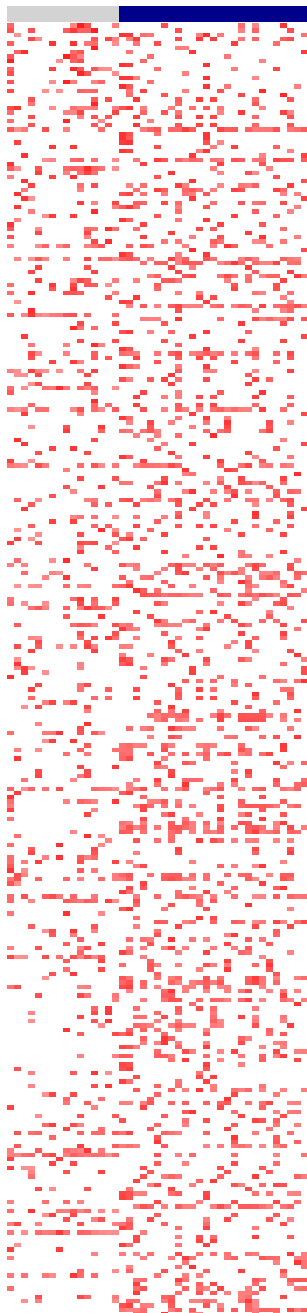

19 Levels Trimmed off

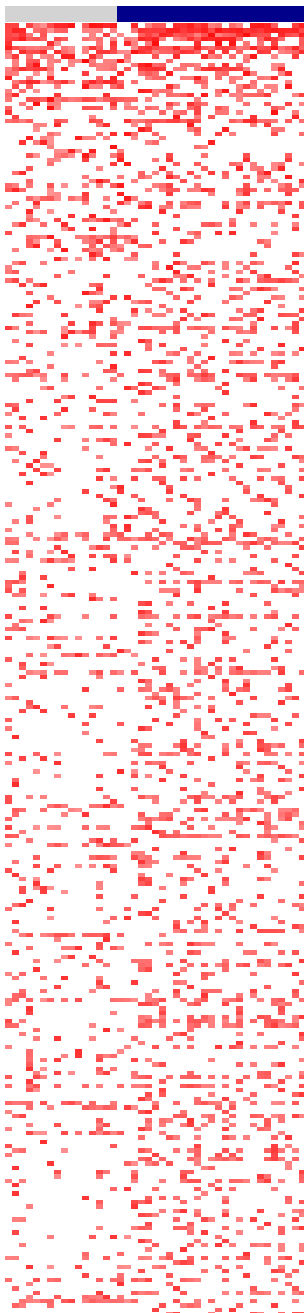

29 Levels Trimmed off

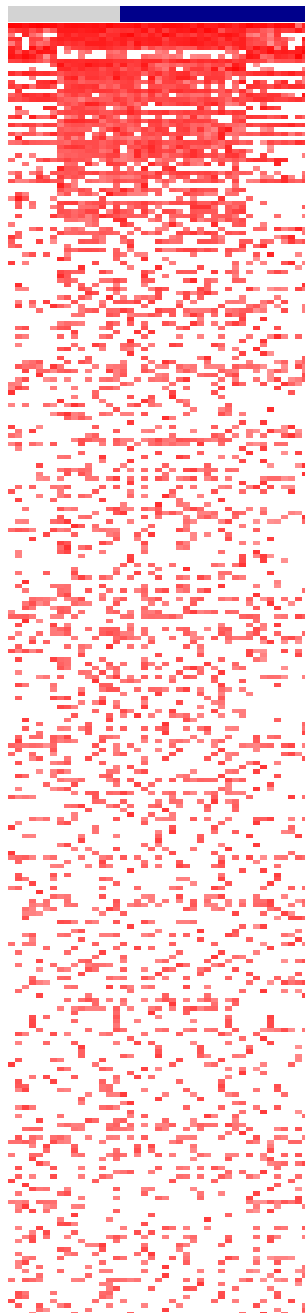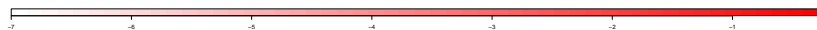

Supplement: 40168_2021_1199_MOESM4_ESM.pdf [file 40168_2021_1199_MOESM4_ESM.pdf]
