# Supplementary material for: Performance determinants of unsupervised clustering methods for microbiome data
Source: PubMed Central journal article supplement (PMC8817542; doi:10.1186/s40168-021-01199-3), 2022-02-05

Original

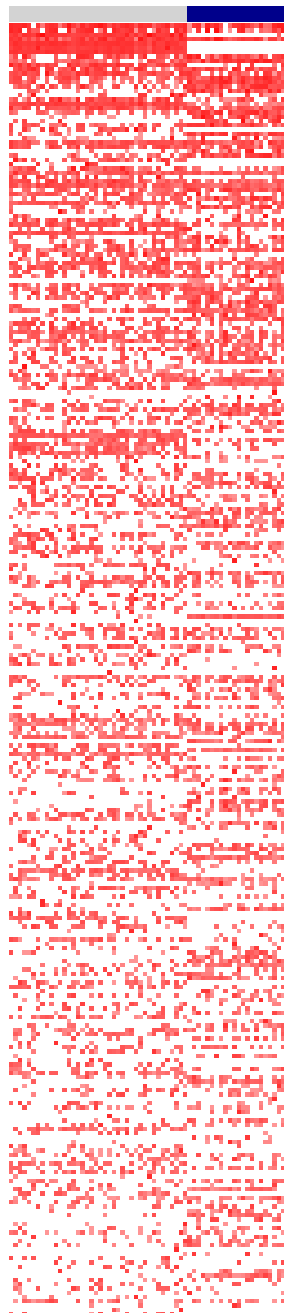

First Generation

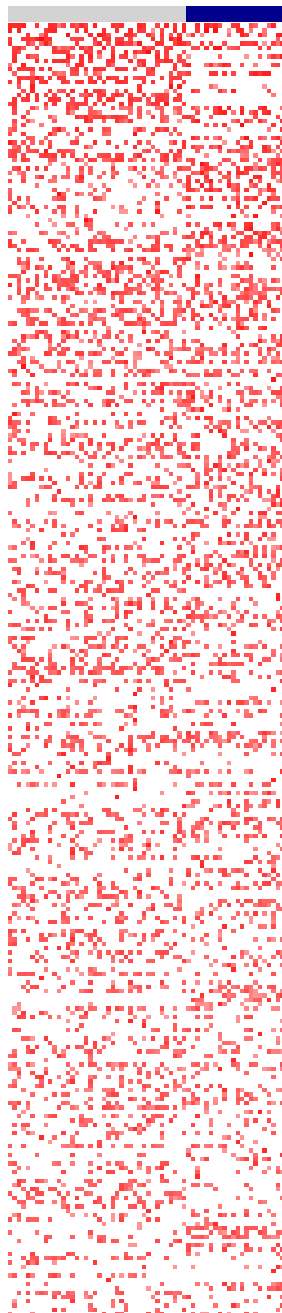

Second Generation

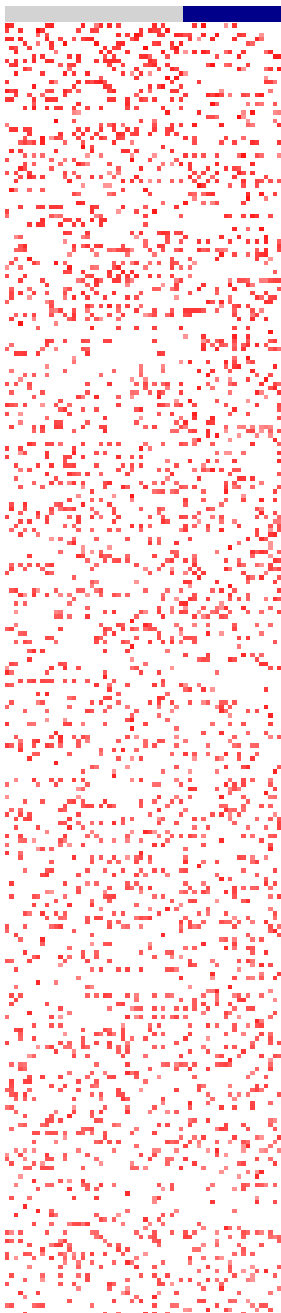

Third Generation

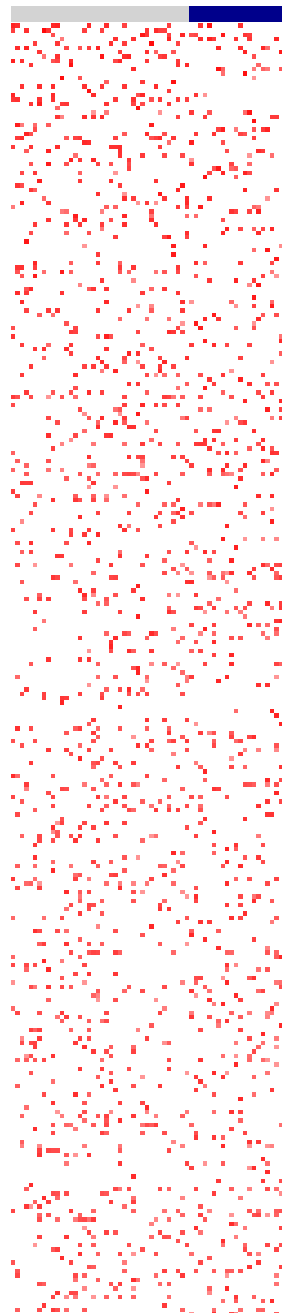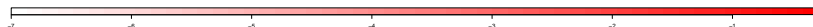

Supplement: 40168_2021_1199_MOESM5_ESM.pdf [file 40168_2021_1199_MOESM5_ESM.pdf]
